# Supplementary material for: Erfassung mentaler Rotationsleistungen im Grundschulalter
Source: Atypon-hosted journal article supplement (doi:10.1026/0012-1924/a000309), 2023-01-16
Supplement: 0012-1924_a000309_esm1.pdf [file 0012-1924_a000309_esm1.pdf]

**Tabelle ESM1.** Verteilung der Analysestichprobe und der Stichprobe ausgeschlossener Kinder hinsichtlich des Geschlechts und der Klassenzugehörigkeit im cMR-I (oberer Bereich) und im cMR-II (unterer Bereich)

|               |                                                                   | Analysestichprobe ( <i>n</i> ) |              |              | Ausgeschlossene Kinder ( <i>n</i> ) |              |              | Vergleich zwischen den Stichproben |          |
|---------------|-------------------------------------------------------------------|--------------------------------|--------------|--------------|-------------------------------------|--------------|--------------|------------------------------------|----------|
|               |                                                                   | Gesamt (%)                     | Weiblich (%) | Männlich (%) | Gesamt (%)                          | Weiblich (%) | Männlich (%) | $\chi^2(df)$                       | <i>p</i> |
| <i>cMR-I</i>  | Gesamt                                                            | 187                            | 94 (50.3)    | 93 (49.7)    | 52                                  | 23 (44.2)    | 29 (55.8)    | 0.76 (1)                           | .384     |
|               | 1. Klasse                                                         | 84 (44.9)                      | 40 (47.6)    | 44 (52.4)    | 37 (71.2)                           | 14 (37.8)    | 23 (62.2)    | 1.42 (1)                           | .233     |
|               | 2. Klasse                                                         | 59 (31.6)                      | 33 (55.9)    | 26 (44.1)    | 10 (19.2)                           | 6 (60.0)     | 4 (40.0)     | 0.07 (1)                           | .791     |
|               | 3. Klasse                                                         | 44 (23.5)                      | 21 (47.7)    | 23 (52.3)    | 5 (9.6)                             | 3 (60.0)     | 2 (40.0)     | 0.30 (1)                           | .583     |
|               | Vergleich der Verteilung auf die Klassen zwischen den Stichproben |                                |              |              |                                     |              |              | 10.47 (2)                          | .005     |
| <i>cMR-II</i> | Gesamt                                                            | 300                            | 156 (51.7)   | 146 (48.3)   | 16                                  | 10 (62.5)    | 6 (37.5)     | 0.75 (1)                           | .385     |
|               | 1. Klasse                                                         | 146 (48.7)                     | 79 (54.1)    | 67 (45.9)    | 11 (68.8)                           | 6 (54.5)     | 5 (45.5)     | < .01 (1)                          | .977     |
|               | 3. Klasse                                                         | 154 (51.3)                     | 77 (50.0)    | 77 (50.0)    | 5 (31.2)                            | 4 (80.0)     | 1 (20.0)     | 1.80 (1)                           | .180     |
|               | Vergleich der Verteilung auf die Klassen zwischen den Stichproben |                                |              |              |                                     |              |              | 2.58 (1)                           | .108     |
