# Supplementary material for: Erfassung mentaler Rotationsleistungen im Grundschulalter
Source: Atypon-hosted journal article supplement (doi:10.1026/0012-1924/a000309), 2023-01-16
Supplement: 0012-1924_a000309_esm3.pdf [file 0012-1924_a000309_esm3.pdf]

**Tabelle ESM3.** Schwierigkeiten ( $P$ ) und Trennschärpen ( $r_{it}$ ) aller identischen Items des cMR-I, getrennt nach Klassenstufe

| Referenzitem | Klasse 1<br>( $n = 84$ ) |          | Klasse 2<br>( $n = 59$ ) |          | Klasse 3<br>( $n = 44$ ) |          | Gesamt<br>( $N = 187$ ) |          |
|--------------|--------------------------|----------|--------------------------|----------|--------------------------|----------|-------------------------|----------|
|              | $P$                      | $r_{it}$ | $P$                      | $r_{it}$ | $P$                      | $r_{it}$ | $P$                     | $r_{it}$ |
| Buchstabe F  | 0.77                     | .82      | 0.81                     | .86      | 0.87                     | .73      | 0.81                    | .82      |
| Buchstabe Q  | 0.72                     | .69      | 0.76                     | .72      | 0.82                     | .55      | 0.76                    | .68      |
| Ziffer 5     | 0.77                     | .82      | 0.78                     | .77      | 0.85                     | .78      | 0.79                    | .80      |
| Ziffer 7     | 0.77                     | .80      | 0.82                     | .64      | 0.85                     | .66      | 0.80                    | .74      |
| Gitarre      | 0.74                     | .69      | 0.82                     | .83      | 0.89                     | .56      | 0.80                    | .73      |
| Loewe        | 0.73                     | .73      | 0.77                     | .64      | 0.82                     | .68      | 0.76                    | .70      |
| Schneemann   | 0.73                     | .85      | 0.82                     | .81      | 0.87                     | .85      | 0.79                    | .84      |
| Trompete     | 0.76                     | .63      | 0.76                     | .74      | 0.84                     | .61      | 0.78                    | .67      |
| Blume        | 0.71                     | .67      | 0.72                     | .57      | 0.85                     | .71      | 0.75                    | .65      |
| Fisch        | 0.76                     | .72      | 0.82                     | .59      | 0.90                     | .58      | 0.81                    | .67      |
| Bauklotz 1   | 0.73                     | .75      | 0.74                     | .81      | 0.77                     | .54      | 0.74                    | .73      |
| Bauklotz 2   | 0.75                     | .80      | 0.78                     | .81      | 0.84                     | .79      | 0.78                    | .80      |
