# Supplementary material for: Erfassung mentaler Rotationsleistungen im Grundschulalter
Source: Atypon-hosted journal article supplement (doi:10.1026/0012-1924/a000309), 2023-01-16
Supplement: 0012-1924_a000309_esm6.pdf [file 0012-1924_a000309_esm6.pdf]

**Tabelle ESM6.** Itemmittelwerte (Lösungsgenauigkeit) aller identischen Items, getrennt nach Klassenstufe

| Referenzitem     | Klasse 1<br>( <i>n</i> = 146) |           | Klasse 3<br>( <i>n</i> = 154) |           | <i>t</i> (298) | <i>p</i> | 95 % KI |       | Cohens <i>d</i> |
|------------------|-------------------------------|-----------|-------------------------------|-----------|----------------|----------|---------|-------|-----------------|
|                  | <i>M</i>                      | <i>SD</i> | <i>M</i>                      | <i>SD</i> |                |          | UG      | OG    |                 |
| Buchstabe b      | 3.37                          | 0.90      | 3.66                          | 0.61      | -3.20          | .000     | -0.46   | -0.11 | -.37            |
| Buchstabe F      | 3.35                          | 0.97      | 3.64                          | 0.66      | -2.98          | .002     | -0.48   | -0.10 | -.35            |
| Buchstabe Q      | 3.05                          | 1.10      | 3.40                          | 0.97      | -2.92          | .002     | -0.58   | -0.11 | -.34            |
| Ziffer 5         | 3.20                          | 1.03      | 3.55                          | 0.77      | -3.28          | .000     | -0.55   | -0.14 | -.38            |
| Ziffer 7         | 3.40                          | 0.98      | 3.55                          | 0.72      | -1.55          | .061     | -0.35   | 0.04  | -.18            |
| Ziffer 9         | 3.43                          | 0.85      | 3.51                          | 0.86      | -0.83          | .204     | -0.28   | 0.11  | -.10            |
| Gitarre          | 3.16                          | 1.03      | 3.58                          | 0.85      | -3.77          | .000     | -0.63   | -0.20 | -.44            |
| Löwe             | 3.26                          | 1.06      | 3.55                          | 0.80      | -2.67          | .004     | -0.51   | -0.08 | -.31            |
| Schneemann       | 3.25                          | 1.03      | 3.66                          | 0.64      | -4.11          | .000     | -0.60   | -0.21 | -.48            |
| Bauklotz         | 3.38                          | 0.98      | 3.64                          | 0.78      | -2.60          | .005     | -0.47   | -0.06 | -.30            |
| einfach abstrakt | 3.27                          | 0.99      | 3.34                          | 0.90      | -0.58          | .281     | -0.28   | 0.15  | -.07            |
| komplex abstrakt | 3.32                          | 0.95      | 3.62                          | 0.71      | -3.03          | .001     | -0.49   | -0.10 | -.35            |

*Anmerkungen:* Die Mittelwerte der 12 Referenzitems ergeben sich aus der Summe der vier Einzelvergleiche je identischen Referenzitem (Range 0 bis 4 Punkte). *p* einseitig. KI = Konfidenzintervall, UG = untere Grenze, OG = obere Grenze.
