# Supplementary material for: Erfassung mentaler Rotationsleistungen im Grundschulalter
Source: Atypon-hosted journal article supplement (doi:10.1026/0012-1924/a000309), 2023-01-16
Supplement: 0012-1924_a000309_esm7.pdf [file 0012-1924_a000309_esm7.pdf]

**Tabelle ESM7.** Schwierigkeiten ( $P$ ) und Trennschärpen ( $r_{it}$ ) aller identischen Items des cMR-II, getrennt nach Klassenstufe

| Referenzitem     | Klasse 1<br>( $n = 146$ ) |          | Klasse 3<br>( $n = 154$ ) |          | Gesamt<br>( $N = 300$ ) |          |
|------------------|---------------------------|----------|---------------------------|----------|-------------------------|----------|
|                  | $P$                       | $r_{it}$ | $P$                       | $r_{it}$ | $P$                     | $r_{it}$ |
| Buchstabe b      | 0.84                      | .67      | 0.91                      | .70      | 0.88                    | .68      |
| Buchstabe F      | 0.84                      | .69      | 0.91                      | .66      | 0.87                    | .69      |
| Buchstabe Q      | 0.76                      | .60      | 0.85                      | .67      | 0.81                    | .64      |
| Ziffer 5         | 0.80                      | .67      | 0.89                      | .69      | 0.85                    | .70      |
| Ziffer 7         | 0.85                      | .71      | 0.89                      | .78      | 0.87                    | .74      |
| Ziffer 9         | 0.86                      | .65      | 0.88                      | .60      | 0.87                    | .62      |
| Gitarre          | 0.79                      | .73      | 0.89                      | .67      | 0.84                    | .72      |
| Loewe            | 0.82                      | .69      | 0.89                      | .65      | 0.85                    | .68      |
| Schneemann       | 0.81                      | .65      | 0.92                      | .62      | 0.87                    | .65      |
| Bauklotz         | 0.85                      | .61      | 0.91                      | .69      | 0.88                    | .65      |
| komplex abstrakt | 0.82                      | .63      | 0.83                      | .60      | 0.83                    | .61      |
| einfach abstrakt | 0.83                      | .65      | 0.90                      | .68      | 0.87                    | .67      |
