# Supplementary material for: Erfassung mentaler Rotationsleistungen im Grundschulalter
Source: Atypon-hosted journal article supplement (doi:10.1026/0012-1924/a000309), 2023-01-16
Supplement: 0012-1924_a000309_esm8.pdf [file 0012-1924_a000309_esm8.pdf]

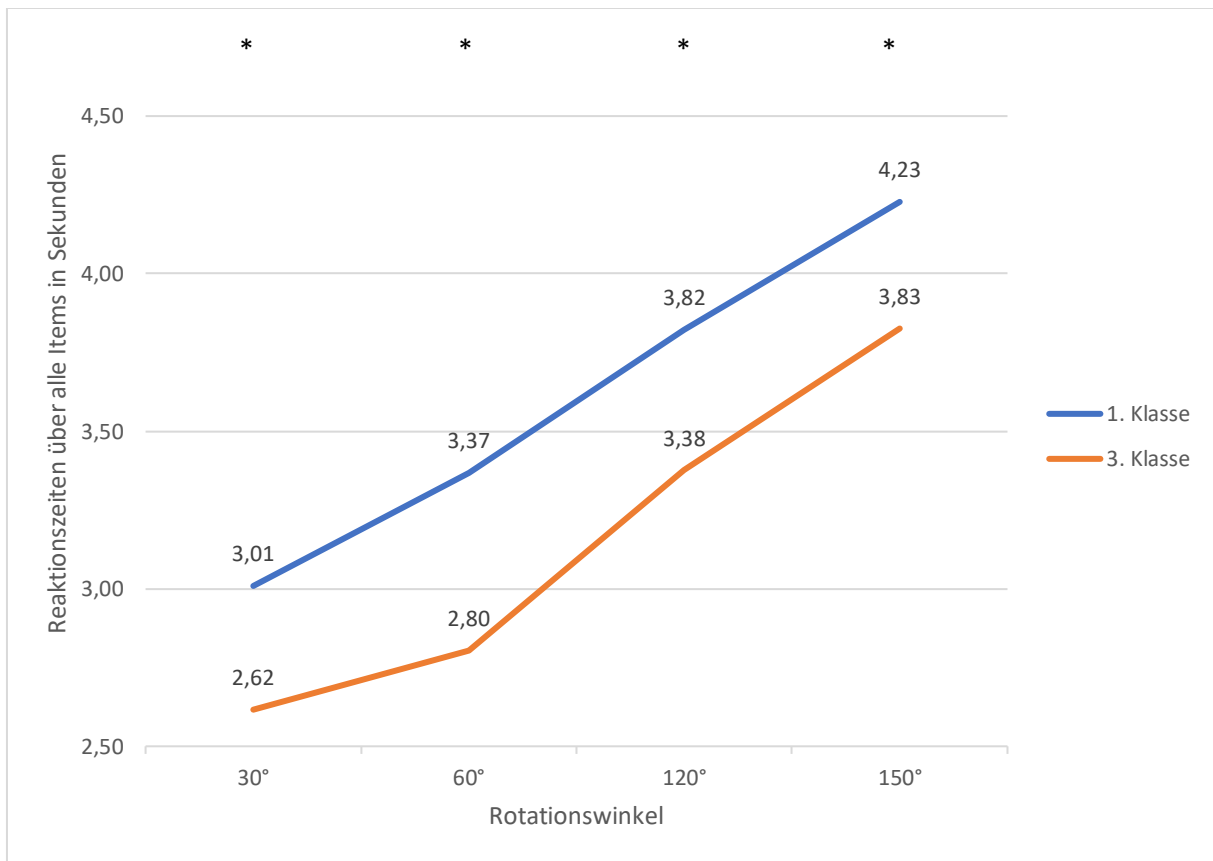

**Abbildung ESM8.** Mittelwerte der Reaktionszeiten (in Sekunden) aller richtig gelösten identischen Items der vier Rotationsgrade, getrennt nach Klassenstufe
