# Supplementary material for: Erfassung mentaler Rotationsleistungen im Grundschulalter
Source: Atypon-hosted journal article supplement (doi:10.1026/0012-1924/a000309), 2023-01-16
Supplement: 0012-1924_a000309_esm9.pdf [file 0012-1924_a000309_esm9.pdf]

**Tabelle ESM9.** Mittelwerte der Reaktionszeiten (in Sekunden) aller richtig gelösten identischen Einzelitems, getrennt nach Klassenstufe

| Referenzitem     | Klasse 1<br>( <i>n</i> = 145) |           | Klasse 3<br>( <i>n</i> = 154) |           | <i>t</i> (297) | <i>p</i> | 95 % KI |      | Cohens <i>d</i> |
|------------------|-------------------------------|-----------|-------------------------------|-----------|----------------|----------|---------|------|-----------------|
|                  | <i>M</i>                      | <i>SD</i> | <i>M</i>                      | <i>SD</i> |                |          | UG      | OG   |                 |
| Buchstabe b      | 3.33                          | 2.01      | 2.72                          | 0.98      | 3.31           | .000     | 0.25    | 0.98 | 0.39            |
| Buchstabe F      | 3.04                          | 1.67      | 2.73                          | 1.45      | 1.74           | .041     | -0.41   | 0.67 | 0.20            |
| Buchstabe Q      | 4.13                          | 2.38      | 3.26                          | 1.66      | 3.61           | .000     | 0.40    | 1.34 | 0.43            |
| Ziffer 5         | 3.17                          | 1.38      | 2.84                          | 1.20      | 2.23           | .013     | 0.39    | 0.63 | 0.26            |
| Ziffer 7         | 3.21                          | 1.69      | 2.60                          | 1.06      | 3.70           | .000     | 0.28    | 0.93 | 0.43            |
| Ziffer 9         | 3.28                          | 1.82      | 2.89                          | 1.29      | 2.16           | .016     | 0.34    | 0.75 | 0.25            |
| Gitarre          | 4.14                          | 2.64      | 3.50                          | 1.42      | 2.60           | .005     | 0.15    | 1.13 | 0.31            |
| Löwe             | 3.67                          | 2.35      | 3.13                          | 1.61      | 2.29           | .011     | 0.08    | 0.99 | 0.34            |
| Schneemann       | 4.07                          | 1.97      | 3.71                          | 1.78      | 1.66           | .049     | -0.07   | 0.79 | 0.27            |
| Bauklotz         | 3.74                          | 2.26      | 2.83                          | 1.13      | 4.33           | .000     | 0.49    | 1.32 | 0.51            |
| einfach abstrakt | 3.99                          | 2.46      | 3.56                          | 1.89      | 1.72           | .043     | -0.06   | 0.94 | 0.20            |
| komplex abstrakt | 4.05                          | 2.12      | 3.57                          | 1.98      | 2.01           | .046     | 0.01    | 0.94 | 0.23            |

Anmerkungen. *p* einseitig. KI = Konfidenzintervall, UG = untere Grenze, OG = obere Grenze.
