# Supplementary figures and images for: Erfassung mentaler Rotationsleistungen im Grundschulalter
Source: Atypon-hosted journal article supplement (doi:10.1026/0012-1924/a000309), 2023-01-16

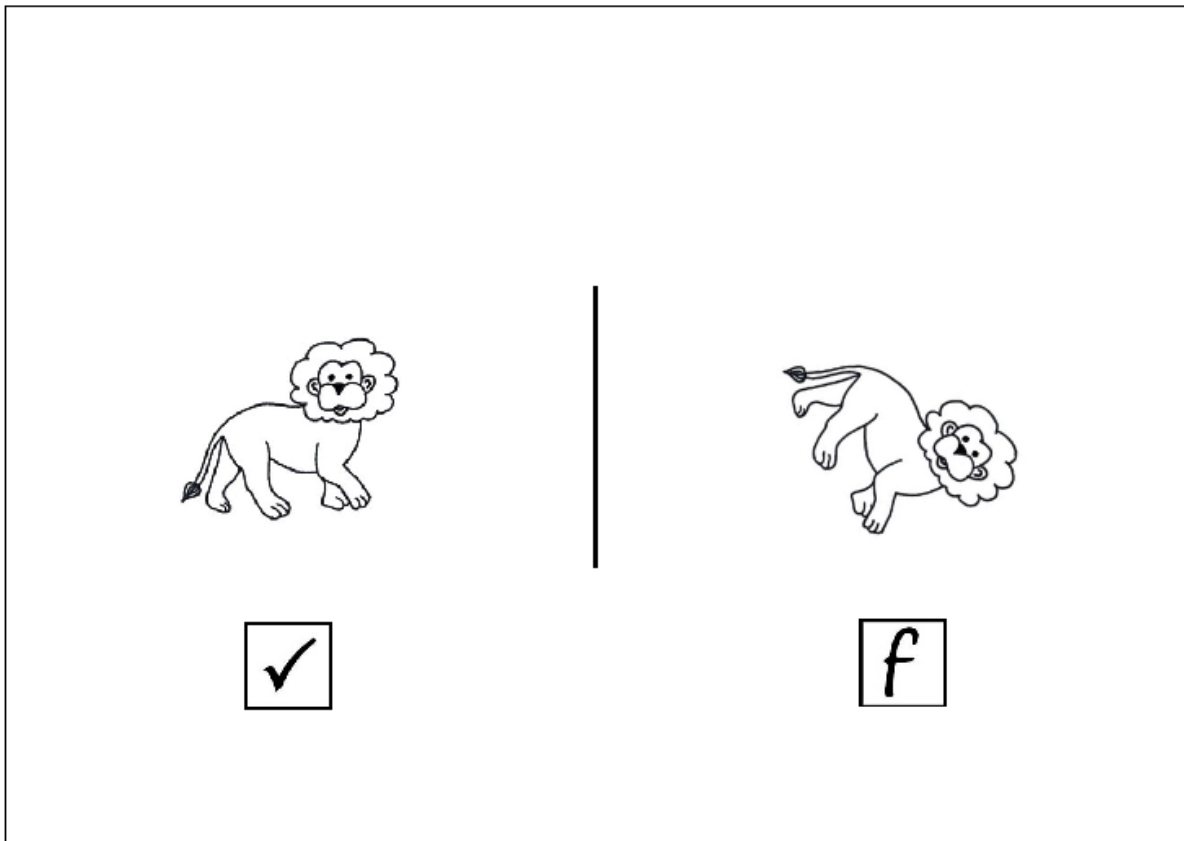

**Abbildung ESM4.** Referenzitem Löwe mit identischem Vergleichsitem und 60° Rotation

Supplement: 0012-1924_a000309_esm4.pdf [file 0012-1924_a000309_esm4.pdf]
